# Supplementary material for: Neuroepithelial circuit formed by innervation of sensory enteroendocrine cells
Source: JCI journal article supplement (doi:10.1172/jci78361), 2015-01-02
Supplement: sd1 [file 1]

## Supplementary Information

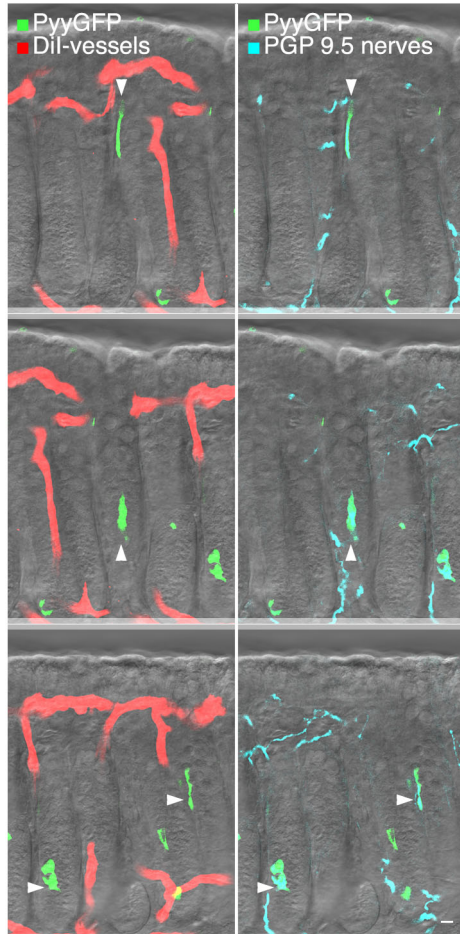

### Figure S1. Neuropods contact nerves but not blood vessels.

We used a vessel painting technique with the lipophilic dye DiI to determine the relationship of enteroendocrine cells with vessels and nerves. These three frames of tissue from the mid colon show that labeled vessels do not contact enteroendocrine cells. However, PGP 9.5-positive nerve fibers contact PyyGFP enteroendocrine cells at their neuropods. Arrowheads show cells of interest and their relationship to vessels versus nerves. Bar = 10 $\mu$ m

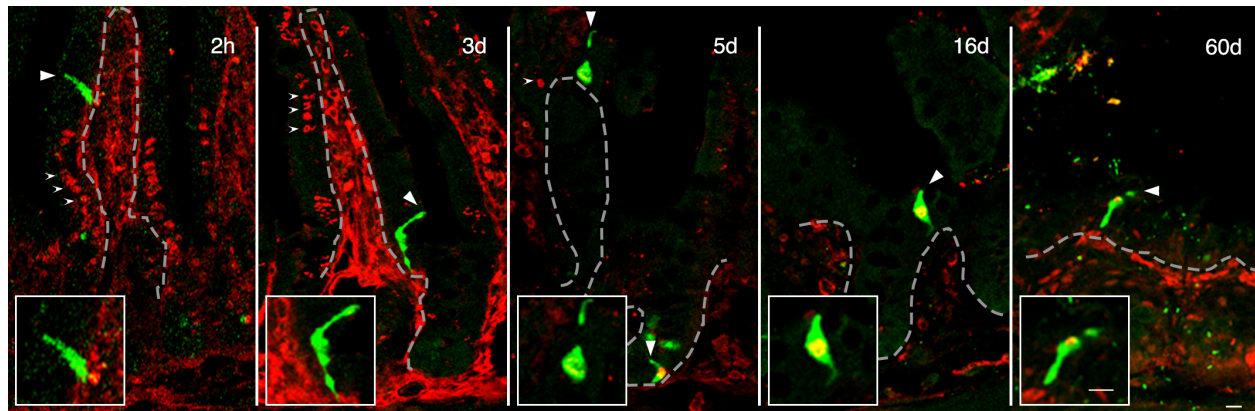

**Figure S2. Long-lived enteroendocrine cells.** We injected BrDU into PyyGFP mice to determine the enteroendocrine cell lifespan. At 2h-post injection, labeled epithelial cells were observed above the crypt-villus junction. Within two hours,  $6.3\% \pm 1.2$  ( $n=3$ ) of PyyGFP cells were labeled with BrDU and at 3d,  $27.6\% \pm 5.6$  ( $n=3$ ) PyyGFP cells were labeled. By 5d most labeled epithelial cells had disappeared. However,  $23.6\% \pm 4.3$  ( $n=3$ ) of PyyGFP cells were labeled. These PyyGFP cells were not only observed both at the tip of the villus but also at the base of the crypts (arrow heads). Most important, 60d after initial injection,  $15.8\% \pm 4.6$  ( $n=3$ ) of counted PyyGFP enteroendocrine cells were labeled indicating that a population of enteroendocrine cells is long-lived. Dotted lines separate epithelium from lamina propria. Bars =  $10\mu\text{m}$

**Supplemental Table 1.** Synaptic-transmission genes expressed in PyyGFP enteroendocrine cells.

| Symbol  | Function       | Cat. No.      | Tissue | Fold expression <sup>†</sup> | SEM <sup>‡</sup> | Pvalue | Tissue | Fold expression | SEM   | Pvalue |
|---------|----------------|---------------|--------|------------------------------|------------------|--------|--------|-----------------|-------|--------|
| Pyy     | Neuropeptide   | Mm00520716_g1 | Colon  | 2.263                        | 1.853            | 0.005  | Ileum  | 2.500           | 2.139 | 0.005  |
| Cck     | Neuropeptide   | Mm00446170_m1 | Colon  | 1.166                        | 0.520            | 0.004  | Ileum  | 1.930           | 1.302 | 0.007  |
| Gcg     | Neuropeptide   | Mm01269055_m1 | Colon  | 2.005                        | 1.313            | 0.001  | Ileum  | 2.969           | 2.802 | 0.036  |
| Th      | Dopa synthesis | Mm00447557_m1 | Colon  | 1.618                        | 1.321            | 0.048  | Ileum  | 2.873           | 2.471 | 0.015  |
| Ddc     | Dopa synthesis | Mm00516688_m1 | Colon  | 0.817                        | 0.289            | 0.012  | Ileum  | 0.886           | 0.418 | 0.007  |
| Dbh     | Dopa synthesis | Mm00460472_m1 | Colon  | n.a.*                        |                  |        | Ileum  | n.a.            |       |        |
| Dat     | Dopa synthesis | Mm00438388_m1 | Colon  | 1.793                        | 1.648            | 0.104  | Ileum  | 1.931           | 1.930 | 0.603  |
| Syn1    | Presynaptic    | Mm00449772_m1 | Colon  | 2.431                        | 2.127            | 0.174  | Ileum  | 2.773           | 2.163 | 0.012  |
| Pclo    | Presynaptic    | Mm00465330_m1 | Colon  | 2.912                        | 2.645            | 0.001  | Ileum  | 3.873           | 3.537 | 0.048  |
| Bsn     | Presynaptic    | Mm00464452_m1 | Colon  | 2.191                        | 1.862            | 0.006  | Ileum  | 1.906           | 1.661 | 0.011  |
| Lphn1   | Presynaptic    | Mm01247150_m1 | Colon  | 1.902                        | 1.703            | 0.109  | Ileum  | 0.841           | 0.201 | 0.005  |
| Nrx1    | Presynaptic    | Mm00660298_m1 | Colon  | 2.312                        | 2.031            | 0.013  | Ileum  | 2.687           | 2.452 | 0.127  |
| Nrx2    | Presynaptic    | Mm01236851_m1 | Colon  | 1.911                        | 1.337            | 0.000  | Ileum  | 1.627           | 1.222 | 0.006  |
| Nrxn3   | Presynaptic    | Mm00553213_m1 | Colon  | n.a.                         |                  |        | Ileum  | n.a.            |       |        |
| Cask    | Presynaptic    | Mm00438005_m1 | Colon  | 1.906                        | 1.901            | 0.761  | Ileum  | 0.143           | 0.709 | 0.371  |
| Ribeye  | Presynaptic    | Mm00515572_m1 | Colon  | 0.282                        | 0.122            | 0.869  | Ileum  | 0.401           | 0.480 | 0.012  |
| Munc13b | Presynaptic    | Mm00498847_m1 | Colon  | 1.724                        | 1.513            | 0.025  | Ileum  | 0.634           | 0.115 | 0.019  |
| Rims1   | Presynaptic    | Mm01225747_m1 | Colon  | n.a.                         |                  |        | Ileum  | n.a.            |       |        |
| Rims2   | Presynaptic    | Mm00453603_m1 | Colon  | 2.331                        | 2.056            | 0.027  | Ileum  | 3.122           | 2.875 | 0.028  |
| Snap25  | Presynaptic    | Mm00456921_m1 | Colon  | 2.060                        | 2.019            | 0.858  | Ileum  | 2.044           | 2.040 | 0.356  |
| Dlg2    | Postsynaptic   | Mm00457160_m1 | Colon  | 1.305                        | 1.258            | 0.987  | Ileum  | 1.532           | 1.332 | 0.688  |
| Dlg3    | Postsynaptic   | Mm01225036_m1 | Colon  | 1.772                        | 1.749            | 0.001  | Ileum  | 0.088           | 1.249 | 0.158  |
| Psd95   | Postsynaptic   | Mm00492193_m1 | Colon  | 3.789                        | 3.772            | 0.018  | Ileum  | 3.236           | 3.040 | 0.004  |
| Nlgn1   | Postsynaptic   | Mm02344305_m1 | Colon  | -0.244                       | 0.628            | 0.034  | Ileum  | 2.511           | 2.316 | 0.208  |
| Nlgn2   | Postsynaptic   | Mm01703404_m1 | Colon  | 1.719                        | 1.469            | 0.197  | Ileum  | 1.044           | 0.365 | 0.006  |
| Nlgn3   | Postsynaptic   | Mm00556834_m1 | Colon  | 1.631                        | 0.808            | 0.002  | Ileum  | 1.597           | 1.418 | 0.039  |
| Homer 1 | Postsynaptic   | Mm00516275_m1 | Colon  | 1.499                        | 0.976            | 0.366  | Ileum  | -0.037          | 0.873 | 0.404  |
| Homer 2 | Postsynaptic   | Mm01314936_m1 | Colon  | 1.791                        | 1.639            | 0.910  | Ileum  | 0.244           | 0.193 | 0.246  |
| Homer 3 | Postsynaptic   | Mm00803747_m1 | Colon  | 0.822                        | 0.478            | 0.829  | Ileum  | 2.142           | 1.955 | 0.246  |
| Syncam1 | Synaptic       | Mm00457556_m1 | Colon  | n.a.                         |                  |        | Ileum  | 1.649           | 1.352 | 0.155  |
| Syncam2 | Synaptic       | Mm00618780_m1 | Colon  | -0.746                       | 1.102            | 0.021  | Ileum  | -0.416          | 0.726 | 0.250  |
| Syncam3 | Synaptic       | Mm01290177_m1 | Colon  | n.a.                         |                  |        | Ileum  | n.a.            |       |        |
| Syncam4 | Synaptic       | Mm00462221_m1 | Colon  | 2.181                        | 1.849            | 0.128  | Ileum  | 2.302           | 1.889 | 0.257  |
| Ncam1   | Synaptic       | Mm01149710_m1 | Colon  | 1.823                        | 1.470            | 0.028  | Ileum  | 2.355           | 2.245 | 0.192  |
| Vglut1  | Glut trans.    | Mm00812886_m1 | Colon  | n.a.                         |                  |        | Ileum  | n.a.            |       |        |
| Vglut2  | Glut trans.    | Mm00499876_m1 | Colon  | n.a.                         |                  |        | Ileum  | n.a.            |       |        |
| Vglut3  | Glut trans.    | Mm00805413_m1 | Colon  | n.a.                         |                  |        | Ileum  | 0.971           | 0.735 | 0.659  |
| Vgat    | Gaba trans.    | Mm00494138_m1 | Colon  | n.a.                         |                  |        | Ileum  | n.a.            |       |        |

<sup>†</sup>Fold expression and SEM were calculated from  $\text{Log}_{10} 2^{-[(\Delta_{\text{Ct}} \text{ PyyGFP positive cells}) - (\Delta_{\text{Ct}} \text{ GFP negative epithelial cells})]}$ . <sup>‡</sup>SEM means standard error of the mean with n=5.  $\S 2^{-\Delta_{\text{Ct}}}$  was used to separate means that differed significantly with Student's t-test. \*n.a. means no amplification observed after 40 cycles.

**Supplementary Video 1. A purified enteroendocrine cell and trigeminal neuron connect.** This time-lapse footage shows the complete process through which a CckGFP enteroendocrine cell connects to a trigeminal (TG) neuron. At plating, the CckGFP cell lies next to the TG neuron. After 12:04 hours, the neuron extends a neurite (white arrow) towards the enteroendocrine cell, and the enteroendocrine cell responds by extending a cytoplasmic process that connects to TG neuron (~14.5 hours). The connection remained stable for 88 hours at which point the experiment was terminated. Bar = 10  $\mu$ m

**Supplementary Video 2. CckGFP enteroendocrine cell seeks to connect to putative axon of TG neuron.** This time-lapse footage shows a CckGFP enteroendocrine cell at a distance from two TG neurons. The TG neuron extends a putative axon to which the CckGFP cell seeks to connect. Noteworthy is the motility of the CckGFP cells compared to other surrounding nonGFP epithelial cells. At the end, the dotted line shows the path of the putative axon to the connecting CckGFP enteroendocrine cell. The axonal fiber is 400mm in length. Bar = 10 $\mu$ m

## Supplemental Methods

**Mice.** Animal care and experiments were carried out in accordance with protocols approved by the Institutional Animal Care and Use Committee of Duke University Medical Center. CckGFP, PyyGFP, PyyCre and R $\phi$ GT were previously developed and described (10, 14, 27, 28). The PyyCre mouse line was a generous gift of Dr. Andrew Leiter from University of Massachusetts Medical School (Worcester, MA). All PyyCre:R $\phi$ GT mice used here carried one PyyCre allele and one R $\phi$ GT allele. The CckGFP line was acquired and kept on a Swiss Webster background and the remaining lines on a C57BL6/J background. Animals were between 6 and 12 weeks of age unless otherwise stated.

**Co-culture of enteroendocrine cells and sensory neurons.** Intestinal epithelial cells were isolated by enzymatic digestion from PyyGFP or CckGFP mice and FAC sorted according to previous reports (14). The trigeminal and dorsal root ganglia served as sources of sensory neurons, as these are more numerous and easier to access in a mouse than those from the vagal nodose ganglia. For enteroendocrine cells, we used CckGFP mice because the yield of FACS cells per mouse is about 40-fold higher than that of PyyGFP mice ( $87166 \pm 19030$  CckGFP vs.  $2146 \pm 1290$  PyyGFP;  $n = 6$ ). This is important because the survival rate over time of enteroendocrine cells is rather low ( $0.50\% \pm 0.17\%$  at D1 to  $0.10\% \pm 0.02\%$  at D6; average of 3 wells per  $n$ ,  $n = 6$ ). Thus, by using CckGFP cells, there were enough viable cells for time-lapse imaging. Primary sensory neurons were dissociated by enzymatic digestion from the trigeminal or dorsal root ganglia of wild-type C57BL6/J mice according to previous reports (15). Neurons were labeled with the Vybrant® DiI cell-labeling solution (Molecular Probes®). GFP-enteroendocrine cells and DiI-labeled neurons were mixed and plated on glass-bottom 35mm dishes (MatTek Corporation) coated with BD growth factor-reduced Matrigel™ (Becton, Dickinson and Company). The plating density was about 10,000 enteroendocrine cells and 5,000 neurons per dish. The culture medium is the following: advanced DMEM/F-12 (GIBCO®), 200 mM L-glutamine, 100 U/mL Penicillin/Streptomycin, 10 mM Hepes, 1X N-2 (GIBCO®), 1X B27 - No Vit A (GIBCO®), and 50 ng/mL EGF (R&D Systems Inc.). Cultures were then imaged over time in an Olympus Vivaview fluorescence incubator with a 20x/0.75 DIC Olympus UPlanSAPO objective. Images were collected using MetaMorph® software (Molecular Devices, LLC) every 10 minutes for endogenous GFP, DiI, and DIC channels at 1024 pixel resolution. Time-lapse videos were composed in MetaMorph®, and necessary labels and captions were added in Adobe Premiere Pro CC (Adobe Systems Inc.).

**Monosynaptic rabies neurotracing.** The virus was obtained from the Duke Viral Vector Core, and initial titer was  $2.1 \times 10^{13}$  ffu/ml. Mice were infected with 1:10 dilution in PBS of B19G SAD $\Delta$ G-GFP rabies virus. The virus was delivered by enema into the distal colon of P3 wild type or PyyCre:R $\phi$ GT mice. Colon tissue collected for immunofluorescence 7 days after infection.

**BrDU pulse labeling.** Four week-old PyyGFP mice were injected once intra-peritoneally with 100 mg/kg BrDU. Colon and ileum tissues were collected for immunohistochemistry at 2 hours and 3, 5, 16, and 60 days post-injection. Prior to the immunofluorescence procedure, DNA from tissue sections was denatured in 2M HCL at 37°C for 30 minutes and tissues washed in boric acid. Subsequently immunofluorescence was performed as previously described (9).

**Blood vessel painting and immunofluorescence.** Blood vessel painting was done according to previous reports (11). We perfused PyyGFP mice using the lipophilic dye DiI and processed the vessel painted tissue for immunohistochemistry with the pan-neuronal marker PGP 9.5. The tissue sections for this purpose were between 60 and 100 microns thick. We cleared the tissue with FocusClear™ (Cedarlane Labs) to allow deep labeling and imaging. For additional immunofluorescence to determine the type of nerves interacting with enteroendocrine cells we used the following antibodies: goat anti-CGRP (Abcam, Cat#. 36001), rabbit anti-Calbindin (Swant, Cat#. CB38a), rabbit anti-NPY (Abcam, Cat#. Ab10980-50), rabbit anti-SYN1 (Cell Signaling, Cat#. 5297), rabbit anti-PSD95 (Cell Signaling, Cat#. 3450), rabbit anti-PGP 9.5 (Ultrasclone, Cat#. RA95101), and rat anti-BrDU (Abcam, Cat#. 6326). Immunofluorescence procedures and some additional antibodies are described in reference (9).

**Confocal microscopy and 3D data visualization.** Image acquisition and 3D visualization software settings are described in detail in reference (9). Optical z-stacks of images were acquired using either a Zeiss 510 or a Zeiss 780 inverted confocal microscope. Optical z-stacks were volume rendered at automatic threshold using Imaris® (Bitplane Inc.). Some images have been rotated/flipped and cropped to fit in figure panels. Besides brightness/contrast, no additional adjustments have been performed.

**Cell isolation, FACS sorting and qRT-PCR analysis of gene expression.** The methods and statistical analysis of gene expression are detailed in reference (9, 14, 20). Fold expression represents  $\log_{10} 2^{-[\Delta C_t \text{ PyyGFP positive cells}] - (\Delta C_t \text{ GFP negative epithelial cells})}$  and error bars represent the SEM. Significant differences were separated by Student's t-test using  $2^{-\Delta C_t}$  values at  $\alpha = 0.05$ .

**Statistics.** The relationship between enteroendocrine cells and blood vessels or nerves was quantified in three or five biological replicates (individual mice) respectively. Each biological replicate represented the average analysis of 20-30 GFP positive cells. The distance between blood vessels and a GFP positive cell was determined using the “measure” option of Fiji software. The number of GFP cells connected to nerves was expressed as a percentage of all of the cells counted. Quantification of BrDU labeled cells was done in three biological replicates and each represented the average of at least 15 PyyGFP cells counted. All values were expressed as the average  $\pm$  SEM.

**Study approval.** The work with animals was approved by the Duke University Institutional Animal Care and Use Committee under the protocol A050-13-02. The Institutional Biosafety Committee approved the use of mutant rabies virus at the Animal Biosafety Level 2 and the registration number is 12-0024-08.
